# Supplementary material for: Modelling Climatically Suitable Areas for Mahogany (Swietenia macrophylla King) and Their Shifts across Neotropics: The Role of Protected Areas
Source: MDPI journal article supplement (doi:10.3390/f14020385), 2023-02-14

**Figure S1.** Relative importance of each independent variable inside the species distribution models. We calculated the mean value (10 replicates models) for each sampling strategy, variable, modelling technique (GLM, BRT, and RF).

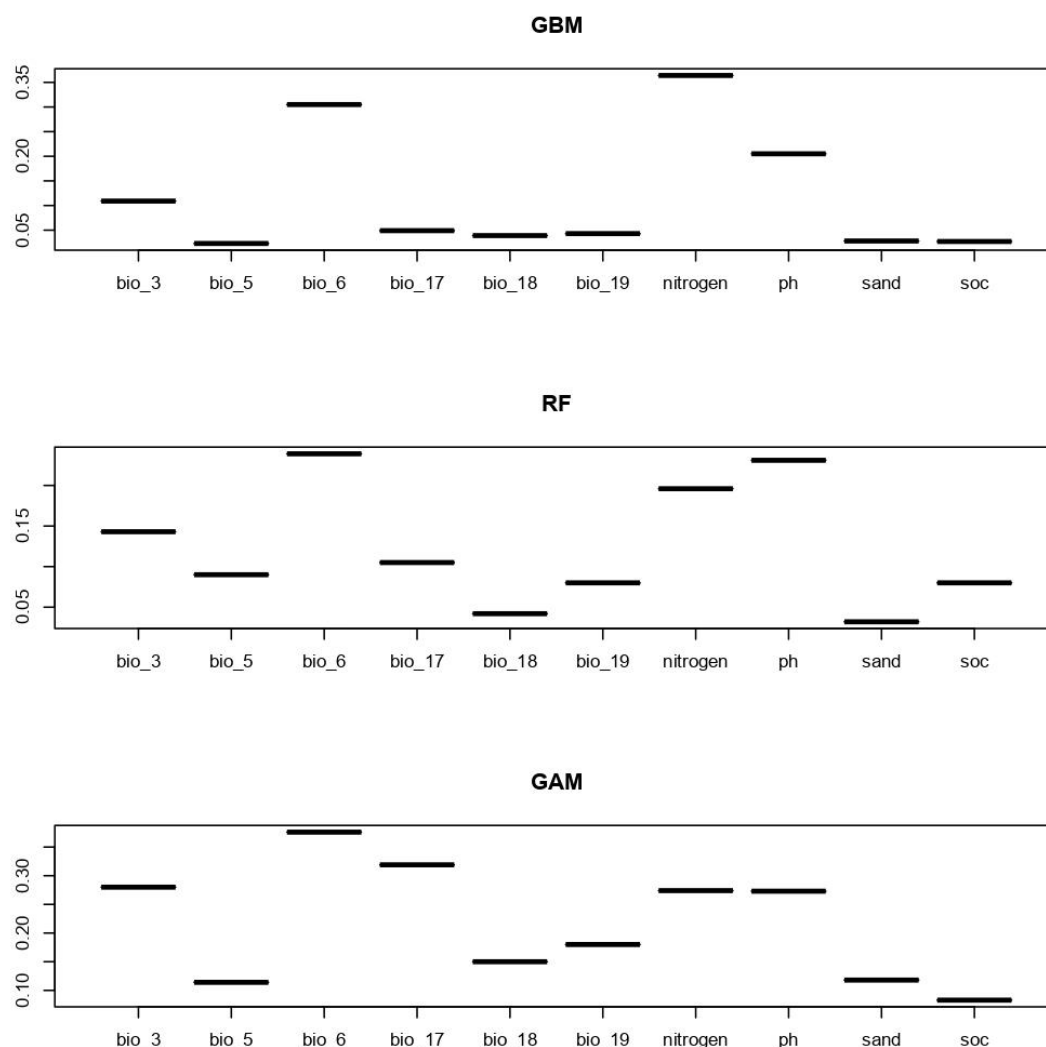

Supplement: s1 [file s1]
