# Supplementary material for: Modelling Climatically Suitable Areas for Mahogany (Swietenia macrophylla King) and Their Shifts across Neotropics: The Role of Protected Areas
Source: MDPI journal article supplement (doi:10.3390/f14020385), 2023-02-14
Supplement: s1 [file s1]

Archive with 1 entries (1 files):
- forests-2119109-supplementary.pdf
